# Supplementary material
Source: PubMed Central journal article supplement (PMC8641303)
Supplement: NIHMS1755224-supplement-2.pdf [file NIHMS1755224-supplement-2.pdf]

**Supplemental Figure 1: Genome editing, related to Figures 1 and 3. (A)** Sequences of the CAS9 targeted GRP78 locus, from 4 different injected embryos. Wild-type DNA sequence for the locus is shown on top; the number of deleted bases is indicated between parenthesis; grey and brown boxes show CAS9 target and PAM sites, respectively. **(B)** Gel migration of PCR amplified GRP78 locus with (+T7) or without (-T7) T7E1 treatment. White arrows show bands smaller than the expected amplicon, due to T7 activity on double strand DNA mismatch resulting from CRISPR/CAS9 indels (6 out of 9 injected embryos showed similar gel bands and indels); M, markers of molecular weight. **(C)** GRP78 locus, with the CAS9 target site and the primers used for pcr amplification.

**A**

```

WT      TCGTAAAATGGCAAAGTCTCAGGCAATTGGAATTGATCTTGGTACAACATATCTTGGTGGTGGTGTGTTTTCAACATGGAAAAGTTGAAATTATCGCTAAT
(-5 bp) TCGTAAAATGGCAAAGTCTCAGGCAATTGGAATTGATCTTGGTACAACATATTC-----TTGGTGTGTTTTCAACATGGAAAAGTTGAAATTATCGCTAAT
(-52 bp) TCGTAAAA-----TGGTGTGTTTTCAACATGGAAAAGTTGAAATTATCGCTAAT
(-26 bp) TCGTAAAATGGCAAAGTCTCAGGCAATTGGAATTGATCTTGGTA-----CAACATGGAAAAGTTGAAATTATCGCTAAT
(-42 bp) TCGTAAAATGGCAAAGTCTCAGGCAATTGGAATTGATCTTGGTAC-----AATTATCGCTAAT
    
```

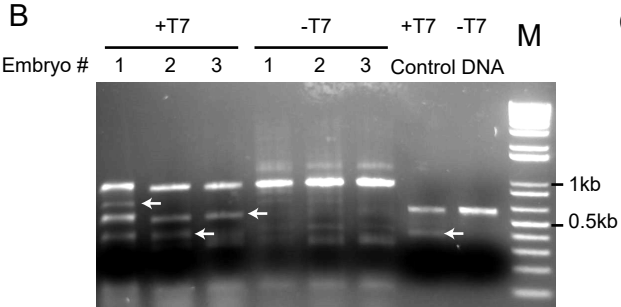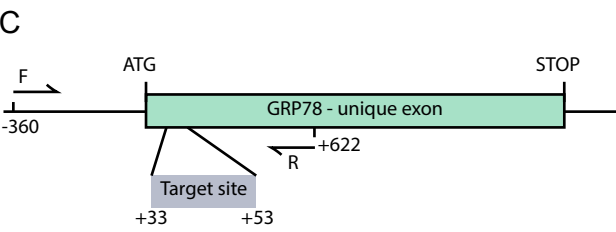

**Supplemental Figure 2: Expression patterns for wild-type and transgenic *epi-a*, *psap* and *tnn* genes, related to Figure 2. (A)**

Mosaic transgene expression in juvenile worms. Transgene name is indicated in the bottom left corner. TagRFP-T (red); Kaede (green); DAPI (nuclei, blue). **(B)** Expression of *epiA::TagRFP-T* transgene in hatchlings. Top **(B1)** and side view **(B2)** of a patch of epidermal cells. Yellow arrowheads point at epidermal cell nuclei positions. **(B3)** Ciliature of an epidermal cell. **(B4)** *EpiA*<sup>+</sup> cells, lie on the pharynx wall. **(C)** Expression of *psap::Kaede* transgene in hatchlings. **(C1)** Kaede expressing cells in the hatchling head (white arrowhead indicates the statocyst position). **(C2)** Kaede expressing cells at the parenchyma-epidermis junction. Kaede<sup>+</sup> digestive tissue protruding, through the pharynx sphincter, within the pharynx cavity, as seen in longitudinal **(C3)** and cross **(C4)** sections. White dashed lines delineate the pharynx cavity; *Ph*, pharynx lumen; *s*, pharynx sphincter. TagRFP-T (red); Kaede (green); DAPI (nuclei, blue). Scale bars, B1, B2, C2, 20  $\mu$ m; B3, 5  $\mu$ m; B4, C1, C3, C4, 50  $\mu$ m. **(D)** Fluorescent *in situ* hybridization of riboprobes (red) for *epiA*, *psap* and *tnn* are shown in adults and hatchlings of *Hofstenia* worms. White arrowhead points to *epiA*-expressing cells in the male penis stylet opening. Yellow arrowheads point at *epiA*-expressing cells in adult that were not consistently recapitulated by transgene expression. An example of the variety of expression patterns observed for *epiA* shown in four different hatchlings. All worms are oriented anterior side up and images of adult worms show their ventral side. Nuclei are counterstained with DAPI (blue). *Ph*, pharynx lumen. Scale bars, 100  $\mu$ m. Images shown are representative of at least 10 and 6 samples for FISH and transgenic, respectively.

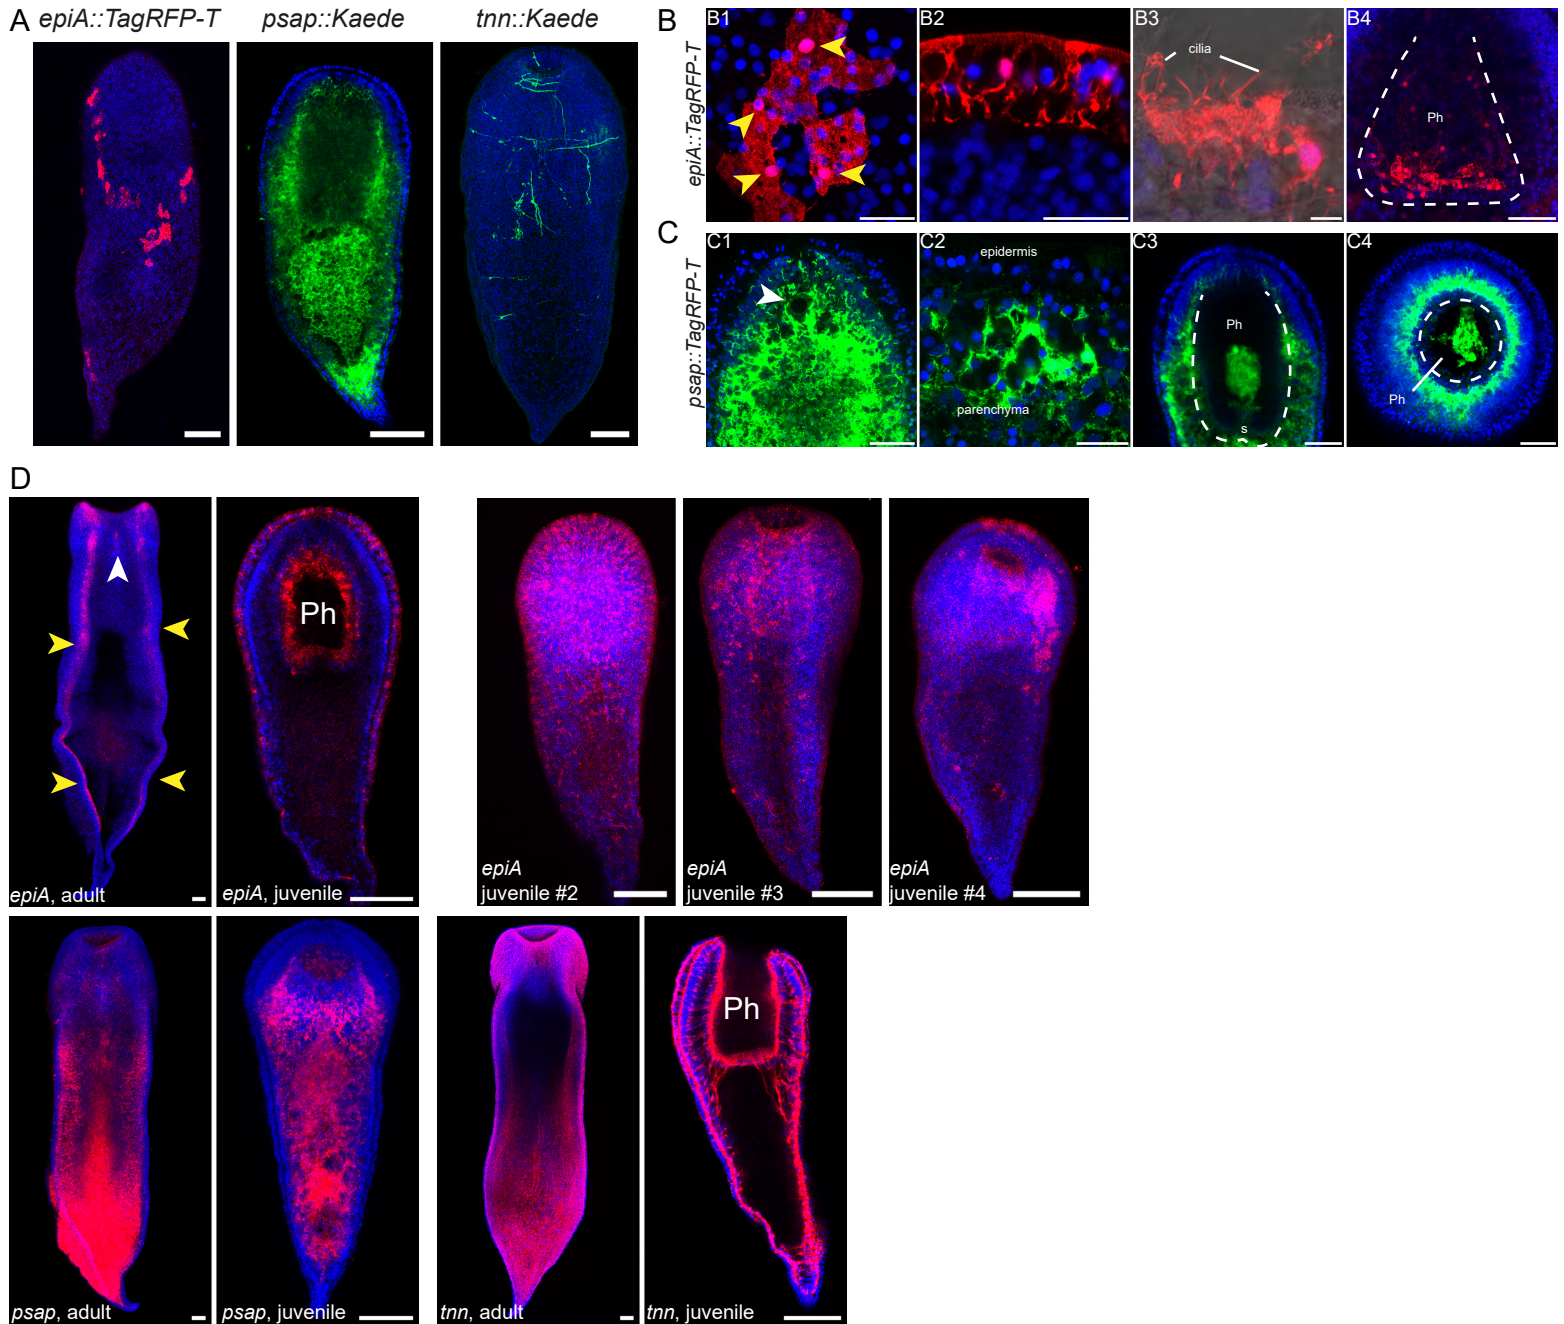

**Supplemental Figure 3: Transgenic toolkit, related to Figure 3. (A)** Controls for FACS and ICC. Anti-Tropomyosin (TPM) immunohistochemistry on FACS-isolated cells, from *tnn::Kaede* transgenics. Scale bars, 20  $\mu$ m. **(B)** Regeneration in *epiA::TagRFP-T* transgenics. Regeneration time course of both anterior and posterior fragments after sub-pharyngeal bisection. Time elapsed since amputation is indicated at the bottom (dpa, days post amputation). White arrowhead points to *de novo* transgene expression in posterior fragment. For each time points, 6 worms were amputated, the frequency of the phenotype is indicated in the left bottom corner. All images are projection of confocal z-stacks, taken ventrally, and oriented anterior side up. Scale bars, 200  $\mu$ m.

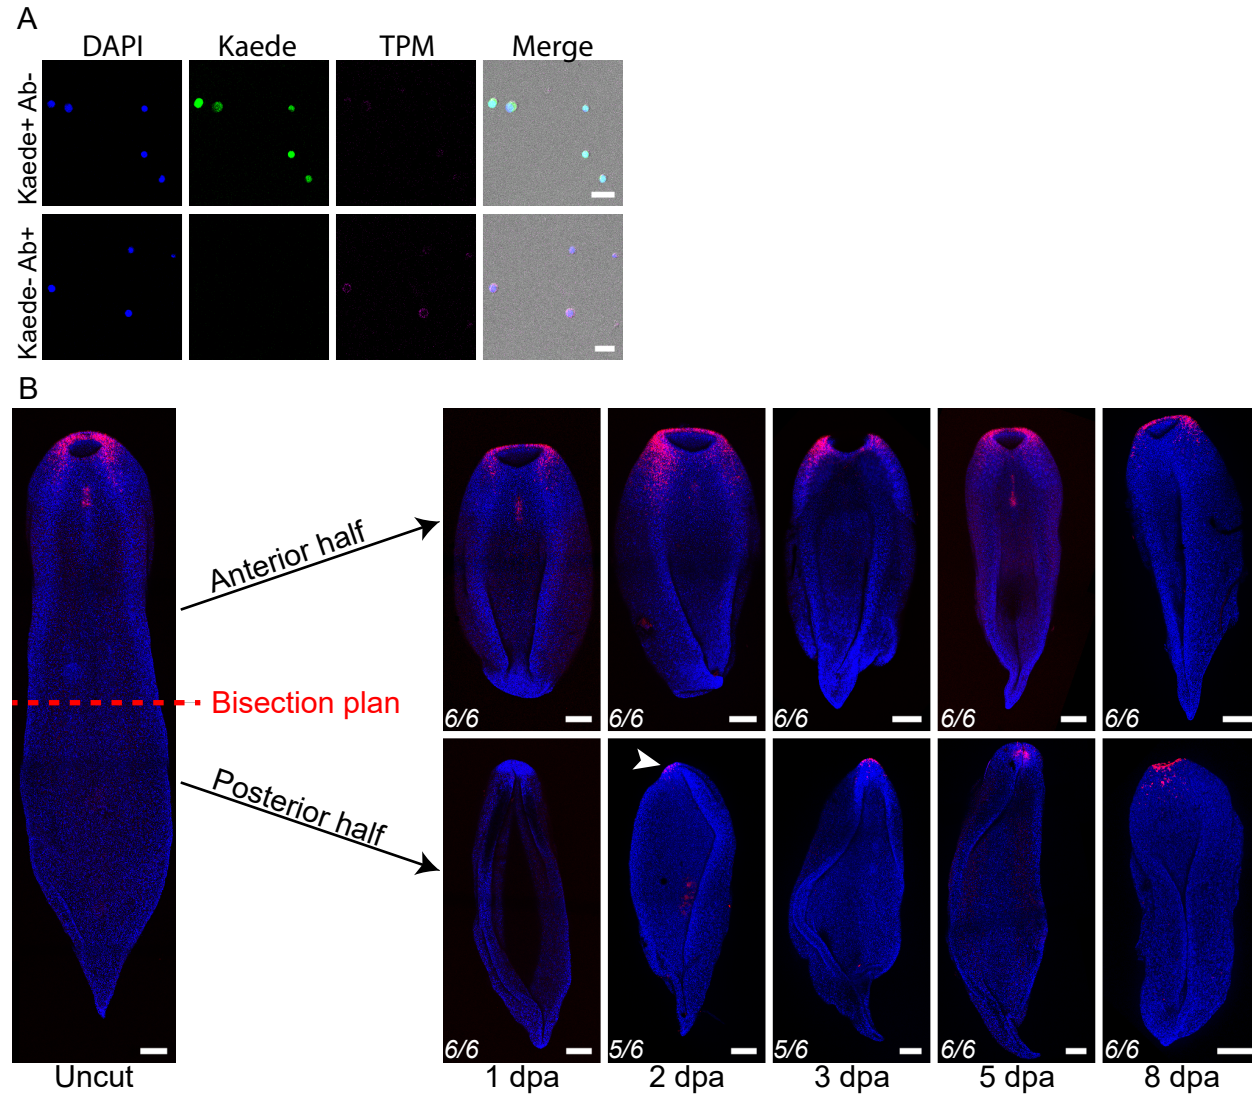

**Supplemental Figure 4: Details of muscle anatomy and live studies, related to Figure 2 and 4.** (A) Full length peripheral muscle fiber in G0 animal. (B) The tip of the tail appears deprived of peripheral muscles. Blue arrowhead points to the posterior extremity of a peripheral muscle. (C) Posterior parenchymal muscles (red arrowhead) connect body wall fibers together (orange arrowheads). Cellular projections can be observed connecting parenchymal fibers together (red arrow). (D, E) The pharynx is contained within a dense, basket-shaped (D), three-layered (E) muscular network. Green arrowheads indicate longitudinal pharyngeal muscles; magenta arrowhead point at circular pharyngeal muscles. Scale bars, A, E, 10  $\mu$ m; B, C, 20  $\mu$ m; D, 50  $\mu$ m. (F) Transgene expression as seen in G1 or G2 embryos at three different time points : right after detection (Early, 4.5 days post fertilization), then 1-2 days later (Mid) and finally, prior hatching (Late, 7-8 days post fertilization), when the embryos are constantly spinning within their capsule. Name of the transgene is indicated on the left side of the panel. Scale bars, 100  $\mu$ m. *Images shown are representative of 6 (muscle, hatchlings) and at least 10 samples (gut and epidermis, embryos).*

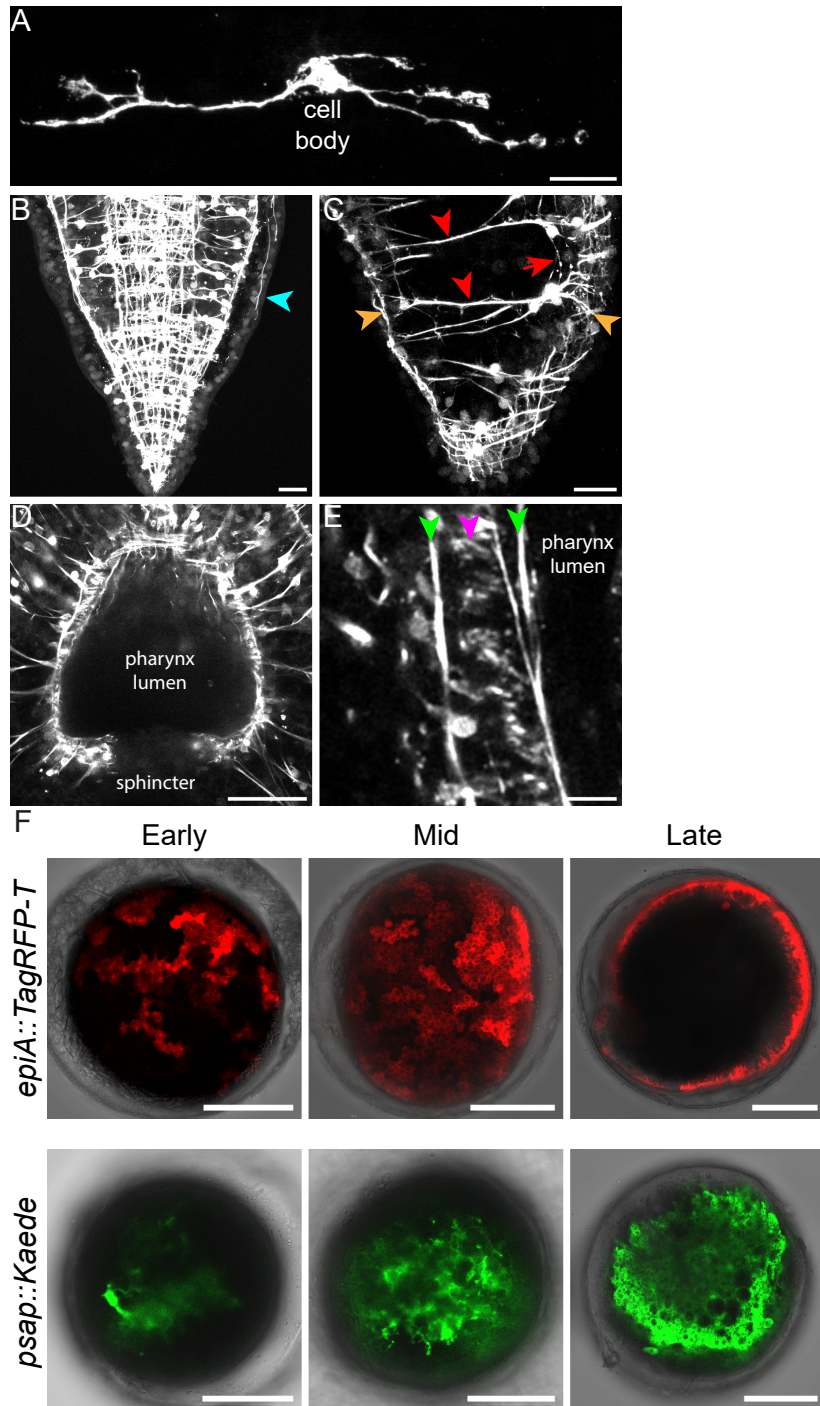

**Supplemental Figure 5: Dual labeling of muscle with *epiA*<sup>+</sup> and *psap*<sup>+</sup> cells, related to Figures 2 and 5. (A) Crossing of G1 *epiA*::*TagRFP-T* with G1 *ttn*::*Kaede* transgenic lines. (Left) Double transgenic *epiA*::*TagRFP-T*; *ttn*::*Kaede*, hatchling, projection of confocal z-stack. (Right, top) Pharynx, longitudinal section. (Right, bottom) Ciliature of *epiA*<sup>+</sup> pharyngeal cells. Kaede (green); TagRFP-T (red). Scale bars, left, 100  $\mu$ m; top right, 50  $\mu$ m; bottom right, 10  $\mu$ m. (B) Dual labeling of muscle with *psap*<sup>+</sup> cells. Anti-TPM immunohistochemistry on *psap*::*Kaede* G2 transgenic animals. (Left) Whole worm (hatchling), projection of confocal z-stack. (Right, top) Pharynx, posterior, cross section. (Right, bottom) Association of digestive tissue with muscle fibers (white arrowheads), in the tail of the animal. Kaede (green); TPM (red). Scale bars, left, 100  $\mu$ m; top right, 50  $\mu$ m; bottom right, 20  $\mu$ m. Images shown are representative of at least 5 samples.**

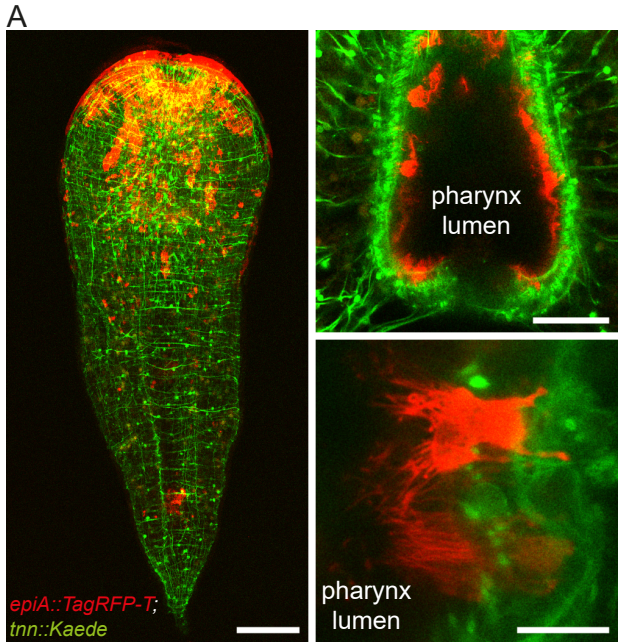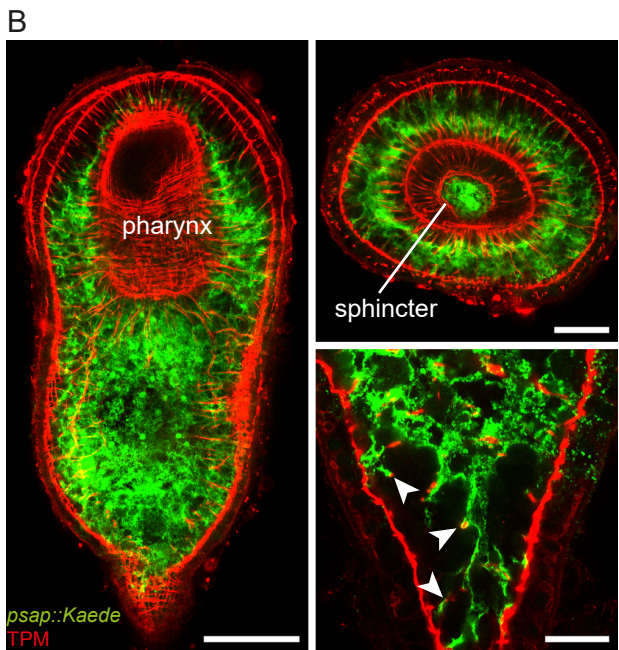

**Supplemental Table 1: Injection troubleshooting guide, related to STAR methods**

| <b>Step</b>     | <b>Issue</b>                                        | <b>Troubleshooting</b>                                                                                                                                                                                                                                                                                                |
|-----------------|-----------------------------------------------------|-----------------------------------------------------------------------------------------------------------------------------------------------------------------------------------------------------------------------------------------------------------------------------------------------------------------------|
| DNA preparation | Low DNA concentration / incomplete digestion        | <ul style="list-style-type: none"> <li>• Decrease elution volume</li> <li>• Digest more plasmid in several reaction tubes, then pool them</li> <li>• Extend digestion time and/or reduce DNA concentration</li> <li>• Use fresh I-SceI enzyme</li> <li>• Minimize the amount of gel while cutting the band</li> </ul> |
|                 | Low DNA purity                                      | <ul style="list-style-type: none"> <li>• Add extra wash buffer steps</li> <li>• Let the wash buffer incubate on the nucleospin membrane (5 min)</li> </ul>                                                                                                                                                            |
|                 | Poor/no band separation                             | <ul style="list-style-type: none"> <li>• Run the gel for a longer time</li> <li>• Check enzyme activity</li> <li>• Add another restriction enzyme to the digestion tube, specific to the plasmid backbone, to generate multiple, distinct fragments.</li> </ul>                                                       |
| Injection dish  | Embryo popping out of the agarose well              | <ul style="list-style-type: none"> <li>• Force the embryo deeper into the well</li> <li>• Make larger/longer pins to the injection mold</li> <li>• Reduce agarose concentration</li> </ul>                                                                                                                            |
|                 | Embryo falling into the wells                       | <ul style="list-style-type: none"> <li>• Make shorter pins to the injection mold</li> <li>• Increase agarose concentration</li> </ul>                                                                                                                                                                                 |
|                 | Embryo rolling into the well while trying to inject | <ul style="list-style-type: none"> <li>• Reorient the embryo and/or the injection dish</li> <li>• Increase agarose concentration</li> <li>• Put less agarose in the injection dish</li> </ul>                                                                                                                         |
|                 | Soft embryo capsule and plasma membrane             | <ul style="list-style-type: none"> <li>• Wash the injection dish several times with SW prior adding the embryos</li> </ul>                                                                                                                                                                                            |
| Injection       | Clogged injection needle                            | <ul style="list-style-type: none"> <li>• Make sure to spin, 30 s at max. speed, the following components : eluted DNA, FL-Dextran, I-SceI buffer, before assembling the injection solution.</li> <li>• Clear the needle</li> <li>• Re-break the needle tip</li> <li>• Load a new needle</li> </ul>                    |
|                 | Reduced flow                                        | <ul style="list-style-type: none"> <li>• Clear the needle</li> <li>• Increase P balance</li> <li>• Re-break the needle tip</li> <li>• Make steeper needles</li> </ul>                                                                                                                                                 |
|                 | Overflow                                            | <ul style="list-style-type: none"> <li>• Decrease P balance</li> <li>• Make thinner needles</li> <li>• Break the needle more gently</li> </ul>                                                                                                                                                                        |

**Supplemental Table 2: Primer informations, related to STAR Methods**

| Primers and restriction enzyme name (5' - 3') used for transgenesis                |                                                                                              | Amplicon size (bp) | Genome scaffold #    | Position on the scaffold (**) |
|------------------------------------------------------------------------------------|----------------------------------------------------------------------------------------------|--------------------|----------------------|-------------------------------|
| <b>Promoter</b>                                                                    |                                                                                              |                    |                      |                               |
| Epi-AF-AsiSI<br>Epi-AR-Ascl                                                        | gcgatcgcTACCTACTCTTGACCCCTTTATA<br>gcgatcgcTGCACACTATCCTAACTACAACAA                          | 2035               | 5                    | 4293372 -<br>4295406          |
| TnnF-AsiSI<br>TnnR-Ascl                                                            | gcgatcgcTCATATGCTGTGGAGGTTAATCTGT<br>ggcgcgccCTAAAAATTCAATTATTTCAATT                         | 4649               | 44                   | 1808578 -<br>1813226          |
| SapF-AsiSI<br>SapR-Ascl                                                            | ggcgcgccGTAACAACACCAAGCCATGTGTTAGCCC<br>ggcgcgccCTTTCCTAATACTGATGCTATTTATCC                  | 3109               | 96                   | 1102963 -<br>1106071          |
| <b>3'UTR</b>                                                                       |                                                                                              |                    |                      |                               |
| Epi-AF (*)<br>Epi-AR-Fsel                                                          | cttaaggcgtaaaggACGTAGACTGTATTAACCATAA<br>ggccggccGTAGACTAGGGAATAGATACACTTTGT                 | 972                | 5                    | 4297179 -<br>4298150          |
| TnnF-Sbfl<br>TnnR-Fsel                                                             | cctgcaggAGGAGTGACACTAACGCAGCTTAT<br>ggccggccAGCCTTGGAATGTTTGAAGAA                            | 1039               | 44                   | 1801098 -<br>1802136          |
| SapF-Sbfl<br>SapR-Fsel                                                             | cctgcaggTAATCAGAAATTAAGAATCAATAGAAG<br>ggccggccGTATATCAATACTAGAATATAAATGC                    | 1134               | 96                   | 1101380 -<br>1102513          |
| <b>Primers used for FISH experiments</b>                                           |                                                                                              | <b>Probe size</b>  | <b>Transcript ID</b> |                               |
| <b>Gene name</b>                                                                   |                                                                                              |                    |                      |                               |
| Tnn B(***)<br>Tnn C                                                                | AAGCTGGAGCTCCACCGCGGAAGGTCAACAGATCACTCAC<br>GGGCGAATTGGGTACCGGGCTTATCACCAGTGAGATCCG          | 780 bp             | 98028242             |                               |
| sap B<br>sap C                                                                     | AAGCTGGAGCTCCACCGCGGAGTTCTTCTTATCGCCTTTGCTG<br>GGGCGAATTGGGTACCGGGATCGGAAGTTTATTCATCCCAATG   | 486 bp             | 98037255             |                               |
| epiA B<br>epiA C                                                                   | AAGCTGGAGCTCCACCGCGGATCAATTGGATTGATTGGAAGGCA<br>GGGCGAATTGGGTACCGGGATTATTTGCAGCGAAAATGTAAGTC | 401 bp             | 98025858             |                               |
| <b>Primers used for CRISPR/CAS9 genome editing validation with T7 endonuclease</b> |                                                                                              |                    |                      |                               |
| F                                                                                  | GAACTTGTTCTTTTGGTAGTTG                                                                       |                    |                      |                               |
| R                                                                                  | AAACATCAAATGTGCCACCAC                                                                        |                    |                      |                               |

(\*) This primer contains 15 bases (lower case) overlapping to the 3' end of a Tag-RFP-T::SV40pA fragment to which it was ligated in a gibson assembly reaction. The resulting fragment was PCR-amplified, digested with Ascl and Fsel enzymes and ligated into a vector already containing the pEpi-A fragment.

(\*\*) Hofstania genome browser is accessible at <http://srivastavalab.rc.fas.harvard.edu/>

(\*\*\*) For each riboprobe, a forward (B) and reverse (C) primer were designer, containing adapter sequences (in red) to facilitate cloning into a vector plasmid
